# Supplementary material
Source: publisher site journal article supplement (https://www.spandidos-publications.com/569/downloadSupplementary)

Figure S1. Overview of gel prepared by western blotting. Although several bands other than the main bands of (A) SGLT2 and (B) GAPDH are observed, there are nonspecific bands associated with the use of polyclonal antibodies as the primary antibodies. SGLT2, sodium-glucose cotransporter 2; GAPDH, glyceraldehyde-3-phosphate dehydrogenase.

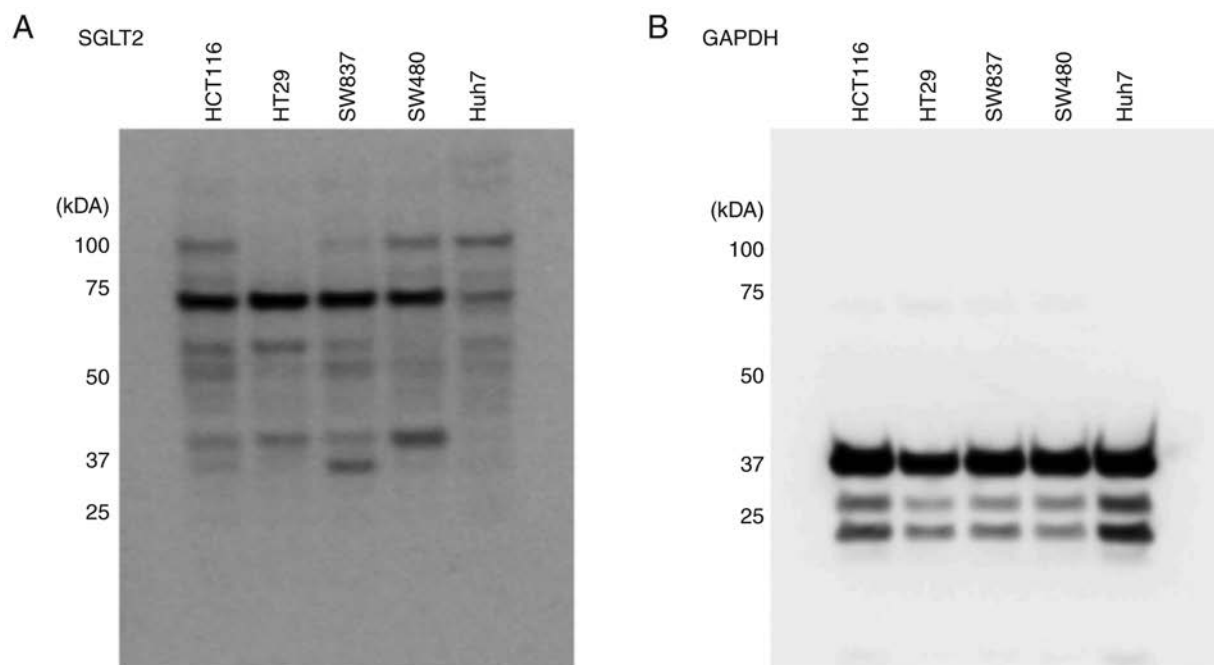

Supplement: Supplementary file 1 [file downloadSupplementary]
